# Supplementary material for: Million-atom molecular dynamics simulations reveal the interfacial interactions and assembly of plant PSII-LHCII supercomplex
Source: Royal Society of Chemistry journal article supplement (doi:10.1039/d2ra08240c), 2023-01-01
Supplement: d2ra08240c2.pdf [file d2ra08240c2.pdf]

## Supplementary Information

for

### **Million-atom molecular dynamics simulations reveal the interfacial interactions and assembly of plant PSII–LHCII supercomplex”**

Ruichao Mao<sup>a</sup>, Han Zhang<sup>a</sup>, Lihua Bie<sup>a</sup>, Lu-Ning Liu<sup>b,c,\*</sup>, Jun Gao<sup>a,\*</sup>

<sup>a</sup> Hubei Key Laboratory of Agricultural Bioinformatics, College of Informatics, Huazhong Agricultural University, Wuhan 430070 Hubei, China (Email: gaojun@mail.hzau.edu.cn)

<sup>b</sup> Institute of Systems, Molecular and Integrative Biology, University of Liverpool, Liverpool L69 7ZB, United Kingdom (Email: luning.liu@liverpool.ac.uk)

<sup>c</sup> Frontiers Science Center for Deep Ocean Multispheres and Earth System & College of Marine Life Sciences, Ocean University of China, Qingdao 266003, China

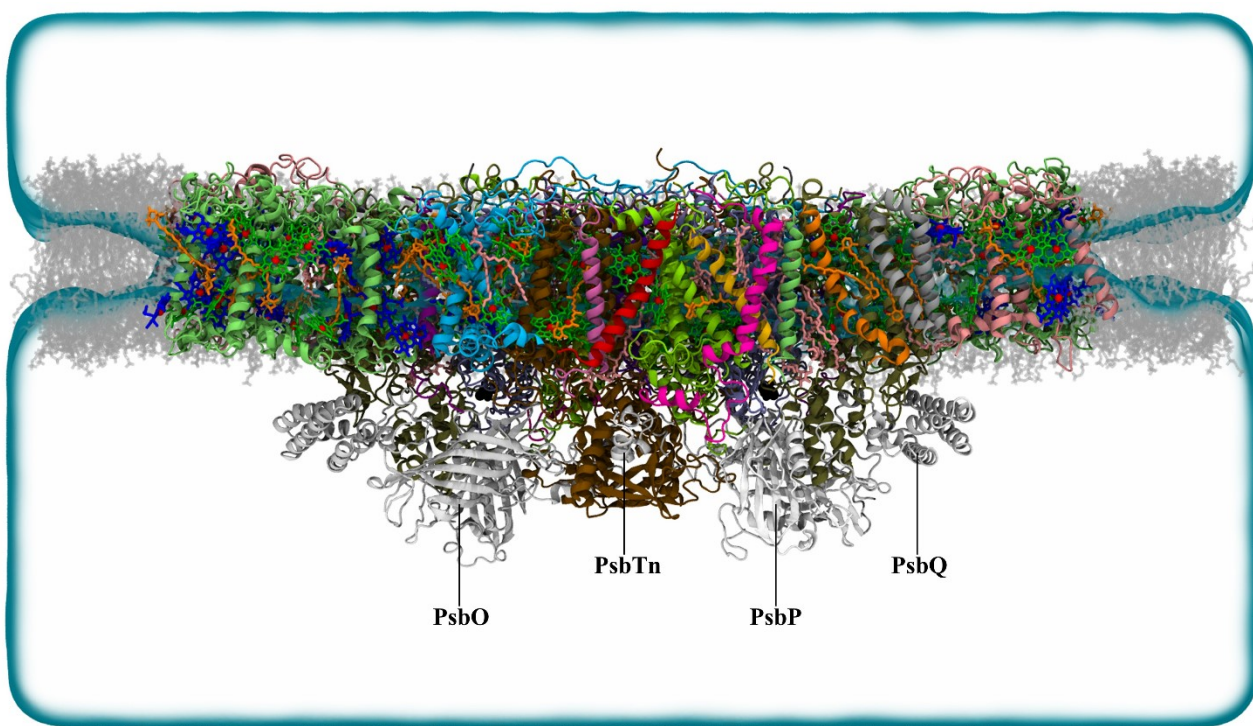

**Fig. S1. Molecular dynamics model of solvated PSII-LHCII complex embedded in phospholipid membranes.** The proteins are shown as cartoon models, in which the antenna and PSII core protein subunits are shown in different colors, and the four extrinsic subunits (PsbO, PsbP, PsbQ, and PsbTn) are shown in white. Cofactors are shown as licorice model, in which CLA is shown in green, CHL is shown in blue, carotenoids are shown in orange and other cofactors are consistently demonstrated in pink. The oxygen-evolving complex OEX is shown in black VDW.

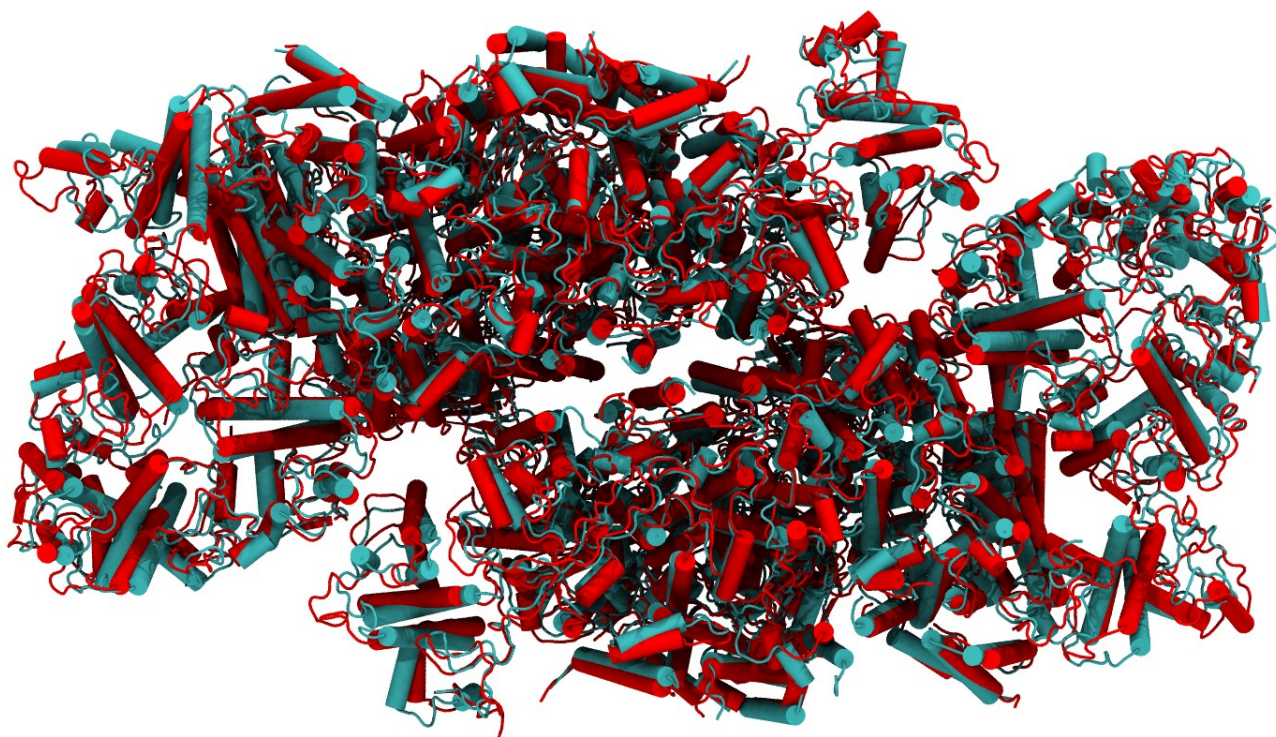

**Fig. S2. Superposition of MD simulation structure and cryo-EM structure.** The proteins are shown as cartoon models. Cyan represents the cryo-EM structure, and red represents the MD simulation structure.

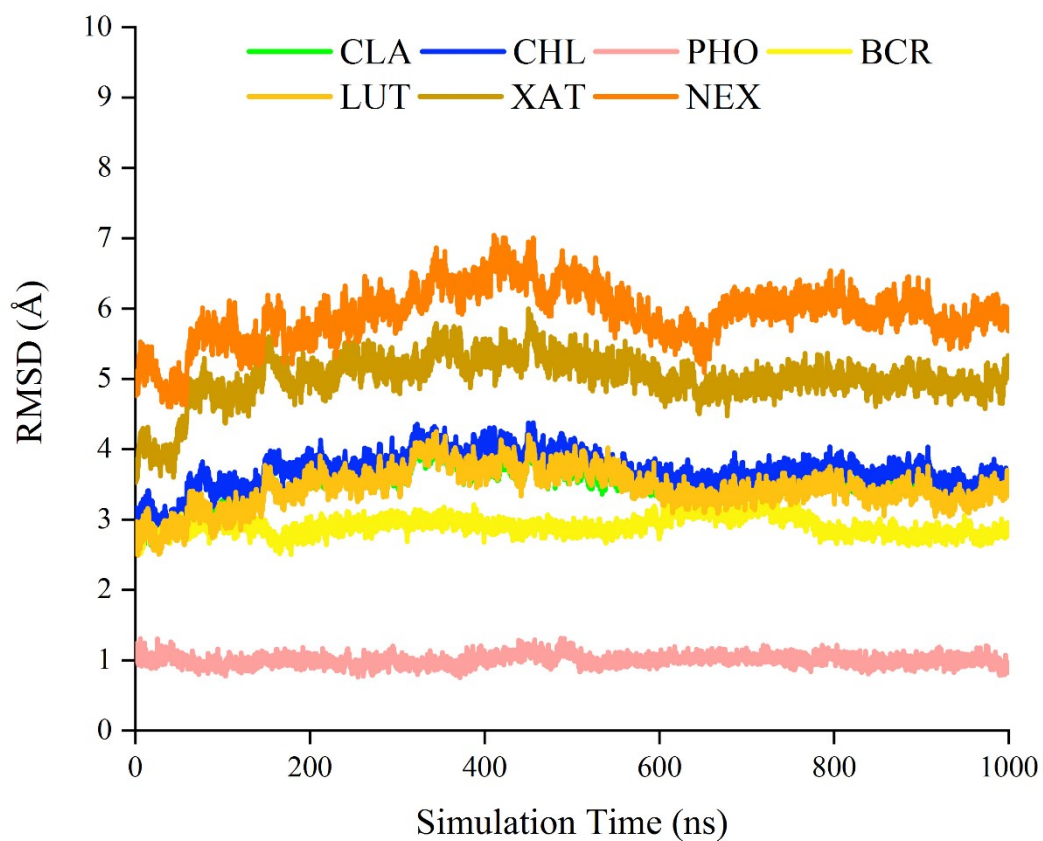

**Fig. S3. RMSD of chlorophyll and carotenoid molecules.** The colors of CLA (green), CHL (blue), PHO (pink), and the four carotenoids BCR, LUT, XAT, and NEX (shown as different depths of yellow) correspond to Supplementary Fig. 1.

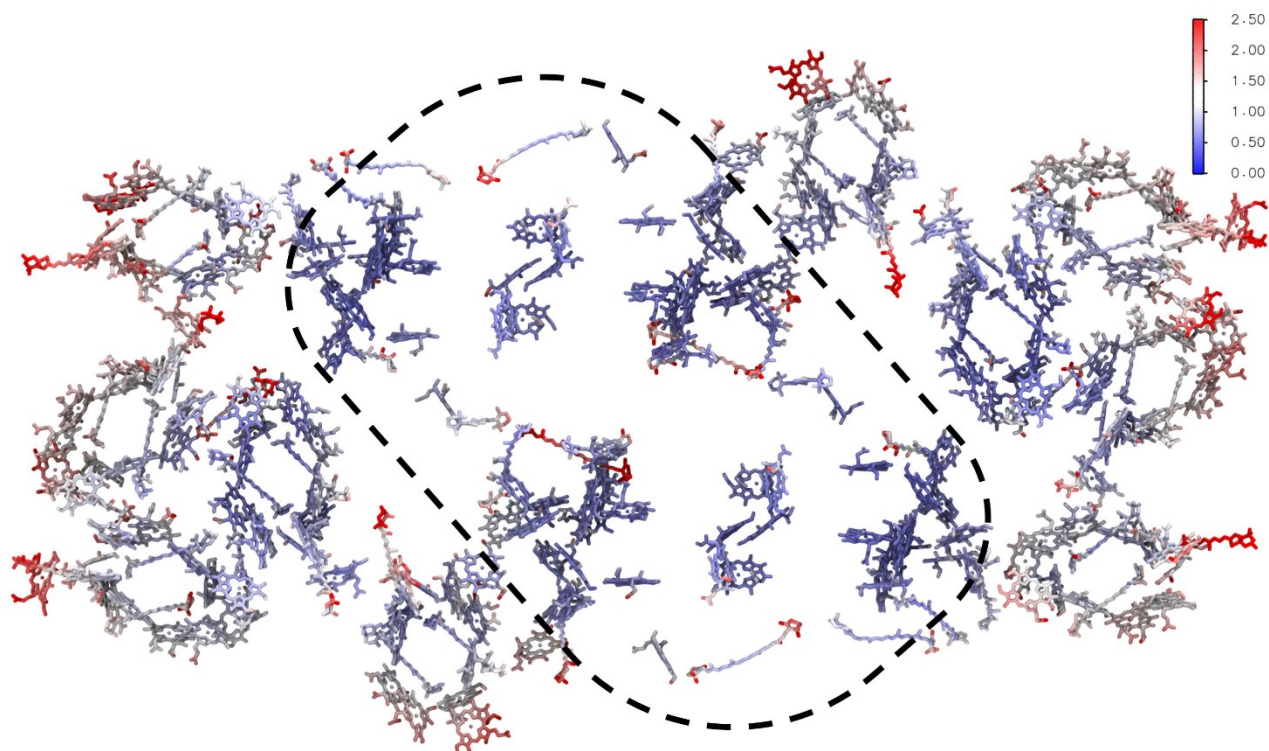

**Fig. S4. Fluctuations of pigment molecules.** The pigment molecules are viewed from the stroma side. The color scale bar shows the RMSF values. Red represents a high RMSF value, and blue represents a small RMSF value.



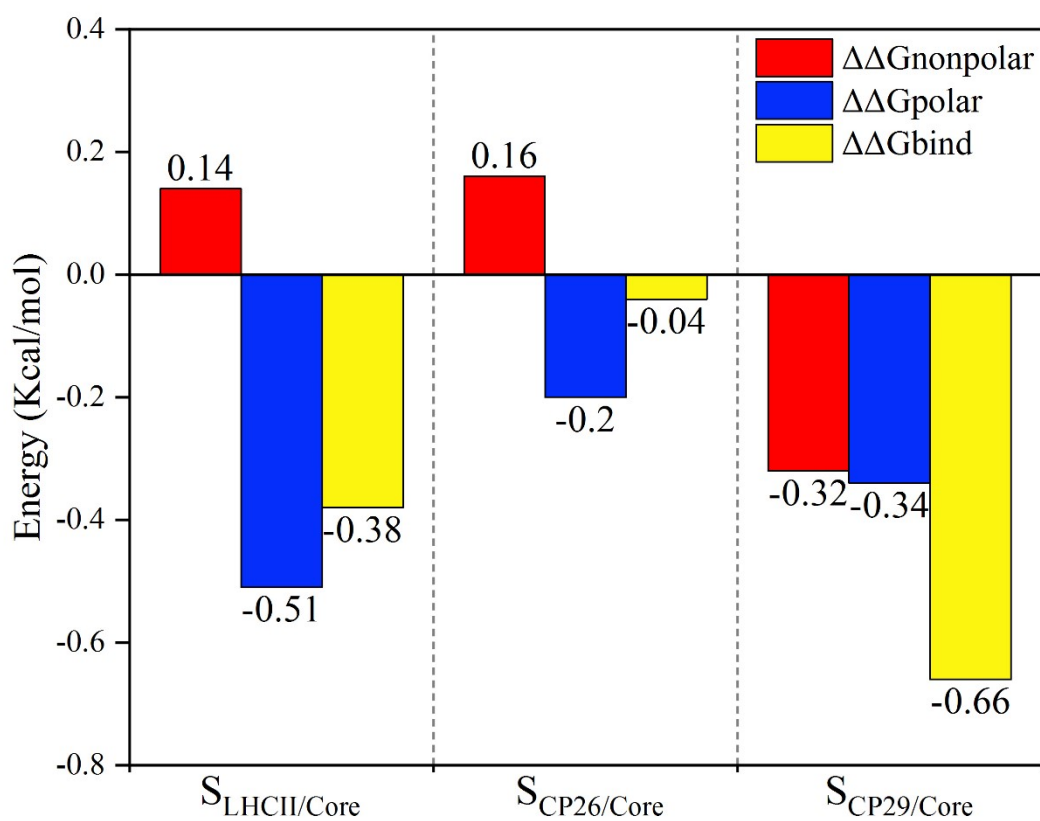

**Fig. S5.** The difference between the average binding free energy of HB/SB-involved hot spots and that of all hot spots. Results were obtained by subtracting all hotspot's average binding free energy from the average binding free energy of hot spots involved in hydrogen bonding.

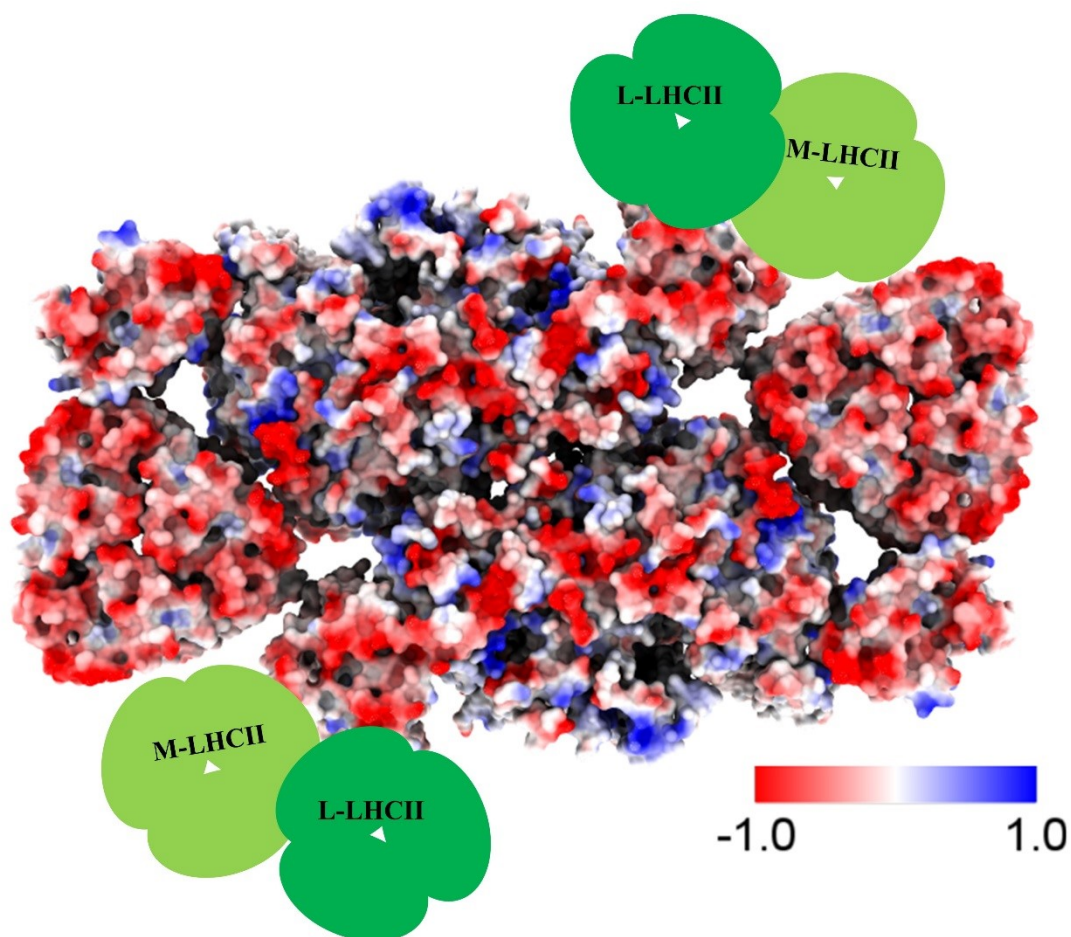

**Fig. S6. Protein surface electrostatic potential of PSII-LHCII complex, viewed from the stromal side.** The protein surface is colored based on the electrostatic potentials ( $kT/e$ ), where the residues with positive potential are in blue, and those with negative potentials are in red. Dark green and light green represent potential locations of L-LHCII and M-LHCII, respectively (Sheng et al., 2019).

**Table S1. Abbreviations and full names of ten cofactors**

| <b>Abbreviation</b> | <b>Full name</b>                          |
|---------------------|-------------------------------------------|
| PHO                 | pheophytin                                |
| BCR                 | $\beta$ -carotene                         |
| PL9                 | plastoquinone-9                           |
| LHG                 | 1,2-dipalmitoyl-phosphatidyl-glycerole    |
| SQD                 | sulfoquinovosyldiacylglycerol             |
| LMG                 | 1,2-distearoyl-monogalactosyl-diglyceride |
| DGD                 | digalactosyl diacyl glycerol              |
| LUT                 | lutein                                    |
| XAT                 | violaxanthin                              |
| NEX                 | neoxanthin                                |



**Table S2. Different internal dielectric constant values influence the binding free energy calculation results of the implicit membrane model and the implicit solvent model, taking  $S_{LHCII/core}$  as an example.**

| Methods                        | Indi <sup>a</sup> | $\Delta G_{vdW}$ | $\Delta G_{np}$ | $\Delta G_{elec}$ | $\Delta G_{PB}$ | $\Delta G_{nonpolar}^b$ | $\Delta G_{polar}^c$ | $\Delta G_{bind}^d$ |
|--------------------------------|-------------------|------------------|-----------------|-------------------|-----------------|-------------------------|----------------------|---------------------|
| <b>Implicit membrane model</b> | 10                | -100.8±13.6      | -11.3±1.0       | 92.1±3.2          | 0.0             | -112.1                  | 92.1                 | -20.0±15.4          |
|                                | 15                | -100.8±13.6      | -11.3±1.0       | 71.6±2.7          | 0.0             | -112.1                  | 71.6                 | -40.5±15.5          |
|                                | 20                | -100.8±13.6      | -11.3±1.0       | 59.2±2.5          | 0.0             | -112.1                  | 59.2                 | -52.9±15.5          |
|                                | 25                | -100.8±13.6      | -11.3±1.0       | 50.7±2.3          | 0.0             | -112.1                  | 50.7                 | -61.4±15.5          |
|                                | 30                | -100.8±13.6      | -11.3±1.0       | 44.5±2.1          | 0.0             | -112.1                  | 44.5                 | -67.6±15.5          |
| <b>Implicit solvent model</b>  | 1                 | -100.8±13.6      | -11.3±1.0       | 716.5±55.0        | -665.8±49.4     | -112.1                  | 50.7                 | -61.4±20.0          |
|                                | 2                 | -100.8±13.6      | -11.3±1.0       | 358.3±27.5        | -327.1±24.4     | -112.1                  | 31.2                 | -80.9±16.8          |
|                                | 3                 | -100.8±13.6      | -11.3±1.0       | 238.8±18.3        | -214.9±16.0     | -112.1                  | 24.0                 | -88.1±16.2          |
|                                | 4                 | -100.8±13.6      | -11.3±1.0       | 179.1±13.8        | -159.0±11.7     | -112.1                  | 20.2                 | -91.9±15.9          |
|                                | 5                 | -100.8±13.6      | -11.3±1.0       | 143.3±11.0        | -125.3±9.2      | -112.1                  | 18.0                 | -94.1±15.8          |
|                                | 6                 | -100.8±13.6      | -11.3±1.0       | 119.4±9.2         | -102.9±7.5      | -112.1                  | 16.6                 | -95.5±15.7          |
|                                | 7                 | -100.8±13.6      | -11.3±1.0       | 102.4±7.9         | -86.8±6.3       | -112.1                  | 15.5                 | -96.6±15.6          |
|                                | 8                 | -100.8±13.6      | -11.3±1.0       | 89.6±6.9          | -74.8±5.4       | -112.1                  | 14.8                 | -97.3±15.5          |

<sup>a</sup>Internal dielectric constant

<sup>b</sup>formula (6), <sup>c</sup>formula (7), <sup>d</sup>formula (5)

**Table S3. Binding free energy of different antenna-core interfaces was calculated using the implicit water model (kcal/mol).**  $\Delta G_{\text{vdW}}$ , the van der Waals interaction energy;  $\Delta G_{\text{np}}$ , the non-polar solvation energy;  $\Delta G_{\text{elec}}$ , the electrostatic interaction energy;  $\Delta G_{\text{PB}}$ , the electrostatic solvation energy;  $\Delta G_{\text{nonpolar}}$ , the contribution of hydrophobic interactions;  $\Delta G_{\text{polar}}$ , the gift of electrostatic interactions;  $\Delta G_{\text{bind}}$ , the binding free energy.

| Methods  | Interface               | $\Delta G_{\text{vdW}}$ | $\Delta G_{\text{np}}$ | $\Delta G_{\text{elec}}$ | $\Delta G_{\text{PB}}$ | $\Delta G_{\text{nonpolar}}^{\text{a}}$ | $\Delta G_{\text{polar}}^{\text{b}}$ | $\Delta G_{\text{bind}}^{\text{c}}$ |
|----------|-------------------------|-------------------------|------------------------|--------------------------|------------------------|-----------------------------------------|--------------------------------------|-------------------------------------|
| Implicit | S <sub>LHCII/core</sub> | -103.5±12.5             | -11.4±1.0              | 718.6±51.2               | -668.2±45.0            | -114.9                                  | 50.4                                 | -64.5±18.0                          |
| Solvent  | S <sub>CP26/core</sub>  | -46.5±5.3               | -6.2±0.5               | 212.1±43.9               | -186.4±43.4            | -52.7                                   | 25.7                                 | -27.0±8.2                           |
| Model    | S <sub>CP29/core</sub>  | -167.4±8.5              | -18.5±1.4              | 531.3±71.7               | -462.9±65.5            | -185.9                                  | 68.4                                 | -117.5±15.5                         |

<sup>a</sup>formula (6), <sup>b</sup>formula (7), <sup>c</sup>formula (5)

**Table S4. Binding free energy of S<sub>LHCII/CP26</sub> and S<sub>LHCII/CP29</sub> (kcal/mol).**

| Interface               | $\Delta G_{\text{vdW}}$ | $\Delta G_{\text{np}}$ | $\Delta G_{\text{elec}}$ | $\Delta G_{\text{PB}}$ | $\Delta G_{\text{nonpolar}}^{\text{a}}$ | $\Delta G_{\text{polar}}^{\text{b}}$ | $\Delta G_{\text{bind}}^{\text{c}}$ |
|-------------------------|-------------------------|------------------------|--------------------------|------------------------|-----------------------------------------|--------------------------------------|-------------------------------------|
| S <sub>LHCII/CP26</sub> | -36.6±6.4               | -4.6±0.8               | 46.0±1.8                 | 0                      | -41.2                                   | 46.0                                 | 4.8±7.0                             |
| S <sub>LHCII/CP29</sub> | -5.8±0.9                | -0.7±0.1               | 48.1±2.1                 | 0                      | -6.5                                    | 48.1                                 | 41.5±2.0                            |

<sup>a</sup>formula (6), <sup>b</sup>formula (7), <sup>c</sup>formula (5)

**Table S5. Binding free energy and corresponding component contribution of hot spots on  $S_{LHCII/Core}$  and  $S_{CP26/Core}$ .**

| System           | Residue | $\Delta G_{vdW}$ | $\Delta G_{elec}$ | $\Delta G_{PB}$ | $\Delta G_{nonpolar}^a$ | $\Delta G_{polar}^b$ | $\Delta G_{bind}^c$ | Proteins |
|------------------|---------|------------------|-------------------|-----------------|-------------------------|----------------------|---------------------|----------|
| $S_{LHCII/Core}$ | L204    | -1.47            | -3.14             | 2.94            | -1.47                   | -0.20                | -1.68               | CP43     |
|                  | S205    | -1.31            | -5.97             | 4.91            | -1.31                   | -1.06                | -2.37               | CP43*    |
|                  | P206    | -2.99            | -1.18             | 1.88            | -2.99                   | 0.70                 | -2.29               | CP43     |
|                  | F210    | -2.82            | -0.96             | 2.05            | -2.82                   | 1.09                 | -1.73               | CP43     |
|                  | L96     | -1.46            | -1.22             | 1.08            | -1.46                   | -0.13                | -1.59               | PsbW     |
|                  | N103    | -5.03            | -9.56             | 12.07           | -5.03                   | 2.51                 | -2.52               | PsbW*    |
|                  | W107    | -3.50            | -0.98             | 2.49            | -3.50                   | 1.51                 | -2.00               | PsbW*    |
|                  | F110    | -2.58            | -0.24             | 1.07            | -2.58                   | 0.83                 | -1.75               | PsbW     |
|                  | S125    | -1.44            | -7.33             | 6.04            | -1.44                   | -1.28                | -2.72               | PsbW*    |
|                  | G126    | -0.67            | -4.07             | 3.12            | -0.67                   | -0.95                | -1.62               | PsbW*    |
|                  | L127    | -2.30            | -1.10             | 1.53            | -2.30                   | 0.43                 | -1.87               | PsbW     |
|                  | F81     | -2.66            | -0.49             | 1.57            | -2.66                   | 1.08                 | -1.58               | LHCII    |
|                  | L85     | -4.21            | 1.23              | 0.15            | -4.21                   | 1.38                 | -2.83               | LHCII    |
|                  | G89     | -1.76            | -0.42             | 0.45            | -1.76                   | 0.03                 | -1.72               | LHCII    |
|                  | V90     | -1.58            | -3.83             | 2.37            | -1.58                   | -1.46                | -3.04               | LHCII*   |
|                  | L113    | -2.65            | -4.27             | 3.62            | -2.65                   | -0.65                | -3.30               | LHCII*   |
|                  | L164    | -1.95            | 0.39              | -0.19           | -1.95                   | 0.21                 | -1.75               | LHCII    |
|                  | L166    | -1.88            | 0.70              | -0.43           | -1.88                   | 0.28                 | -1.60               | LHCII    |
|                  | L213    | -4.63            | -0.27             | 2.38            | -4.63                   | 2.10                 | -2.53               | LHCII    |
|                  | P216    | -1.92            | -1.62             | 1.80            | -1.92                   | 0.19                 | -1.74               | LHCII    |
| E175             | -0.98   | 44.74            | -41.09            | -0.98           | 3.64                    | 2.66                 | LHCII*              |          |
| K179             | -0.88   | -53.75           | 57.39             | -0.88           | 3.64                    | 2.76                 | LHCII               |          |
| D215             | -1.82   | 51.50            | -47.08            | -1.82           | 4.42                    | 2.60                 | LHCII               |          |
| $S_{CP26/Core}$  | F182    | -3.31            | -3.46             | 4.33            | -3.31                   | 0.87                 | -2.44               | CP43     |
|                  | W33     | -1.29            | -4.82             | 4.48            | -1.29                   | -0.34                | -1.63               | PsbZ*    |
|                  | L39     | -2.72            | -5.95             | 6.20            | -2.72                   | 0.25                 | -2.47               | CP26*    |
|                  | L231    | -2.63            | 0.37              | -0.07           | -2.63                   | 0.3                  | -2.33               | CP26*    |
|                  | I234    | -1.91            | 0.93              | -0.67           | -1.91                   | 0.26                 | -1.65               | CP26     |

<sup>a</sup>formula (6), <sup>b</sup>formula (7), <sup>c</sup>formula (5)

\*Residues involved in hydrogen bonds/salt bridges formation

**Table S6. Binding free energy and corresponding component contribution of hot spots on SCP29/Core•**

| Residue | $\Delta G_{\text{vdW}}$ | $\Delta G_{\text{elec}}$ | $\Delta G_{\text{PB}}$ | $\Delta G_{\text{nonpolar}}^{\text{a}}$ | $\Delta G_{\text{polar}}^{\text{b}}$ | $\Delta G_{\text{bind}}^{\text{c}}$ | Proteins |
|---------|-------------------------|--------------------------|------------------------|-----------------------------------------|--------------------------------------|-------------------------------------|----------|
| T228    | -3.11                   | -3.21                    | 3.76                   | -3.11                                   | 0.55                                 | -2.56                               | D1       |
| E229    | -3.01                   | 59.33                    | -57.91                 | -3.01                                   | 1.42                                 | -1.59                               | D1*      |
| N230    | -1.74                   | -8.21                    | 5.82                   | -1.74                                   | -2.39                                | -4.13                               | D1*      |
| R127    | -1.48                   | -92.65                   | 91.19                  | -1.48                                   | -1.46                                | -2.94                               | CP47*    |
| R220    | -1.00                   | -93.11                   | 92.48                  | -1.00                                   | -0.63                                | -1.63                               | CP47     |
| R230    | -1.42                   | -98.35                   | 94.85                  | -1.42                                   | -3.50                                | -4.92                               | CP47*    |
| D125    | -0.47                   | 77.00                    | -74.03                 | -0.47                                   | 2.97                                 | 2.5                                 | CP47     |
| P25     | -3.41                   | 2.36                     | -1.00                  | -3.41                                   | 1.35                                 | -2.06                               | PsbH     |
| L26     | -1.80                   | 0.77                     | -0.71                  | -1.80                                   | 0.06                                 | -1.73                               | PsbH     |
| Y30     | -4.35                   | -5.69                    | 6.71                   | -4.35                                   | 1.02                                 | -3.32                               | PsbH*    |
| G31     | -1.88                   | -2.60                    | 2.86                   | -1.88                                   | 0.26                                 | -1.62                               | PsbH*    |
| K32     | -3.94                   | -120.65                  | 120.77                 | -3.94                                   | 0.12                                 | -3.82                               | PsbH*    |
| V33     | -3.02                   | -2.58                    | 2.22                   | -3.02                                   | -0.36                                | -3.38                               | PsbH*    |
| P35     | -2.10                   | -1.16                    | 1.35                   | -2.10                                   | 0.19                                 | -1.91                               | PsbH     |
| E29     | -1.53                   | 83.26                    | -78.91                 | -1.53                                   | 4.34                                 | 2.82                                | PsbH     |
| Q9      | -0.51                   | -5.05                    | 3.37                   | -0.51                                   | -1.68                                | -2.19                               | PsbL*    |
| Y45     | -3.21                   | -0.70                    | 1.44                   | -3.21                                   | 0.74                                 | -2.47                               | CP29     |
| L46     | -3.37                   | -5.21                    | 4.44                   | -3.37                                   | -0.76                                | -4.14                               | CP29*    |
| Q47     | -4.03                   | -6.54                    | 6.63                   | -4.03                                   | 0.10                                 | -3.93                               | CP29*    |
| Y48     | -6.15                   | -1.54                    | 5.03                   | -6.15                                   | 3.50                                 | -2.65                               | CP29*    |
| Y50     | -5.87                   | -3.79                    | 6.28                   | -5.87                                   | 2.49                                 | -3.38                               | CP29*    |
| L53     | -4.59                   | -3.01                    | 3.56                   | -4.59                                   | 0.55                                 | -4.04                               | CP29*    |
| Q55     | -7.72                   | -10.11                   | 13.68                  | -7.72                                   | 3.57                                 | -4.15                               | CP29*    |
| N56     | -4.58                   | -13.52                   | 11.01                  | -4.58                                   | -2.51                                | -7.09                               | CP29*    |
| K59     | -2.78                   | -106.82                  | 106.78                 | -2.78                                   | -0.04                                | -2.83                               | CP29*    |
| N60     | -3.04                   | -5.87                    | 6.54                   | -3.04                                   | 0.67                                 | -2.37                               | CP29*    |
| L80     | -3.39                   | -0.80                    | 1.93                   | -3.39                                   | 1.13                                 | -2.26                               | CP29     |
| S84     | -0.57                   | -10.46                   | 8.60                   | -0.57                                   | -1.86                                | -2.43                               | CP29*    |
| D49     | -1.03                   | 19.00                    | -16.44                 | -1.03                                   | 2.56                                 | 1.54                                | CP29*    |

<sup>a</sup>formula (6), <sup>b</sup>formula (7), <sup>c</sup>formula (5)

\*Residues involved in hydrogen bonds/salt bridges formation

**Table S7. Hydrogen bonds and salt bridges at the antenna-core interfaces in the cryo-EM structure.**

|                               | Hydrogen bond |            | Salt bridge |        | Distance (Å) <sup>a</sup> | Subunits in PSII core |
|-------------------------------|---------------|------------|-------------|--------|---------------------------|-----------------------|
|                               | Donor         | Acceptor   | Acidic      | Basic  |                           |                       |
| <i>S<sub>LHCII/core</sub></i> | ASN_88@Nδ     | ASN_103@Oδ | -           | -      | 3.20                      | PsbW                  |
|                               | TRP_107@Nε    | ASN_88@Nδ  | -           | -      | 3.44                      | PsbW                  |
|                               | TRP_107@Nε    | ASN_88@Oδ  | -           | -      | 2.89                      | PsbW                  |
| <i>S<sub>CP26/core</sub></i>  | SER_59@Oγ     | LEU_231@O  | -           | -      | 2.75                      | PsbZ                  |
|                               | LYS_37@Nζ     | LEU_39@O   | -           | -      | 3.18                      | PsbZ                  |
| <i>S<sub>CP29/core</sub></i>  | GLN_55@Nε     | THR_10@O   | -           | -      | 2.64                      | CP47                  |
|                               | GLN_47@Nε     | TYR_30@O   | -           | -      | 2.77                      | PsbH                  |
|                               | TYR_50@Oη     | ASP_125@Oδ | -           | -      | 2.82                      | CP47                  |
|                               | ASN_60@Nδ     | GLU_229@Oε | -           | -      | 2.84                      | D1                    |
|                               | ARG_69@Nη     | ARG_127@Nη | -           | -      | 3.12                      | CP47                  |
|                               | GLN_81@Nε     | GLU_29@Oε  | -           | -      | 3.18                      | PsbH                  |
|                               | TYR_48@N      | GLY_31@O   | -           | -      | 3.32                      | PsbH                  |
|                               | ASN_14@Nδ     | ASP_54@N   | -           | -      | 3.36                      | CP47                  |
|                               | GLN_47@Nε     | LYS_32@N   | -           | -      | 3.46                      | PsbH                  |
|                               | VAL_33@N      | TYR_45@O   | -           | -      | 3.04                      | PsbH                  |
|                               | ASN_230@N     | GLN_55@O   | -           | -      | 3.44                      | D1                    |
|                               | ARG_476@Nη    | LEU_53@O   | -           | -      | 3.50                      | CP47                  |
|                               | -             | -          | ASP49       | LYS130 | 3.91                      | CP47                  |
| -                             | -             | GLU85      | LYS32       | 5.52   | PsbH                      |                       |
| -                             | -             | ASP477     | LYS59       | 5.85   | CP47                      |                       |
| -                             | -             | ASP483     | LYS59       | 4.89   | CP47                      |                       |

<sup>a</sup>Hydrogen bond based on a distance between non-hydrogen atoms of less than 3.5 Å. Salt bridge based on a distance between acidic oxygen atoms and basic nitrogen atoms of less than 6 Å.

### Supplementary Video 1:

### Supplementary References

Sheng X, Watanabe A, Li AJ, Kim E, Song CH, et al. (2019) Structural insight into light harvesting for photosystem II in green algae. *Nature Plants* **5**: 1320-1330
